1 **Temporally-precise basolateral amygdala activation is required for the**  
2 **formation of taste memories in gustatory cortex**

3 Elor Arieli<sup>a</sup>, Ron Gerbi<sup>a</sup>, Mark Shein-Idelson<sup>a,b</sup>, Anan Moran<sup>a,b,1</sup>

4 <sup>a</sup>Department of Neurobiology, The George S. Wise Faculty of Life Sciences, Tel Aviv  
5 University, Tel Aviv, Israel 6997801; <sup>b</sup>Sagol School of Neuroscience, Tel Aviv University,  
6 Tel Aviv, Israel 6997801

7 **<sup>1</sup>Corresponding author:**

8 Anan Moran, Ph.D

9 Sherman building, room #409

10 Tel Aviv University,

11 Tel Aviv, 6997801

12 Israel

13 Tel: +972-3-6409166

14 Email: [anan@tauex.tau.ac.il](mailto:anan@tauex.tau.ac.il)

15 Number of pages: 46

16 Number of figures: 7

17 Number of tables: 0

18 Number of multimedia: 0

19 Number of 3D models: 0

20 Number of words for abstract: 237

21 Number of words for introduction: 616

22 Number of words for discussion: 1252

23 **The authors declare no competing financial interests**

24 **Acknowledgments:**

- 25 We thank Daniel Udi, Danit Miron and Lihi Cohen for technical assistance. We thank Prof.
- 26 Kobi Rosenblum, Dr. David Levitan and Dr. Veronica Flores for guidance regarding the c-
- 27 Fos staining. The research was supported by seed grant from the Tel Aviv University.

## 28 **Abstract**

29            Learning to associate malaise with the intake of novel food is critical for survival. Since  
30 food poisoning may take hours to affect, animals developed brain circuits to transform the  
31 current novel taste experience into a taste memory trace (TMT) and bridge this time lag. Ample  
32 studies showed that the basolateral amygdala (BLA), the nucleus basalis magnocellularis  
33 (NBM) and the gustatory cortex (GC) are involved in TMT formation and taste-malaise  
34 association. However, how dynamic activity across these brain regions during novel taste  
35 experience promotes the formation of these memories is currently unknown. We used the  
36 conditioned taste aversion (CTA) learning paradigm in combination with short-term  
37 optogenetics and electrophysiological recording in rats to test the hypothesis that temporally  
38 specific activation of BLA projection neurons is essential for TMT formation in the GC, and  
39 consequently CTA. We found that late-epoch (LE, >800ms), but not the early epoch (EE, 200-  
40 700ms), BLA activation during novel taste experience is essential for normal CTA, for early  
41 c-Fos expression in the GC (a marker of TMT formation) and for the subsequent changes in  
42 GC ensemble palatability coding. Interestingly, BLA activity was not required for intact taste  
43 identity or palatability perceptions. We further show that BLA-LE information is transmitted  
44 to GC through the BLA→NBM pathway where it affects the formation of taste memories.  
45 These results expose the dependence of long-term memory formation on specific temporal  
46 windows during sensory responses and the distributed circuits supporting this dependence.

47

48

49

50

51

52

53

54 **Significance**

55           Consumption of a novel taste may result in malaise and poses a threat to animals. Since  
56 the effects of poisoning appear only hours after consumption, animals must store the novel  
57 taste's information in memory until they associate it with its value (nutritious or poisonous).  
58 Here we elucidate the neuronal activity patterns and circuits that support the processing and  
59 creation of novel-taste memories in rats. Our results show that specific patterns of temporal  
60 activation in the basolateral amygdala transmitted across brain areas are important for  
61 formation of taste memory and taste-malaise association. These findings may shed light on  
62 long-term activity-to-memory transformation in other sensory modalities.

63

64

65 **Keywords:** Taste system, Taste memory, Basolateral amygdala, Conditioned taste aversion,  
66 Neuronal dynamics

## 67 **Introduction**

68           A novel food poses a dilemma to animals: To eat or not to eat? On the one hand a  
69 new food may be highly nutritious, but on the other hand it may be toxic and life  
70 threatening (Rozin, 1976). To avoid the fatal consequences of poisoning, brain circuits  
71 have evolved to quickly detect novel tastes, transform these tastes into novel-taste memory  
72 trace (TMT)(Bermudez-Rattoni, 2014) to bridge the time-lag between consumption and  
73 malaise, and form a taste-malaise association (termed conditioned taste aversion [CTA])  
74 (Garcia et al., 1955).

75           Decades of research have identified many brain regions that are involved in taste  
76 processing and memory. Among them, the basolateral amygdala (BLA), the gustatory  
77 cortex (GC) and the nucleus basalis magnocellularis (NBM) were acknowledged as key  
78 regions for taste novelty processing and taste memories acquisition (Bermudez-Rattoni,  
79 2014; Yiannakas and Rosenblum, 2017). The GC is central to novelty processing, TMT  
80 formation and CTA learning (Bermudez-Rattoni, 2014; Moran and Katz, 2014; Yiannakas  
81 and Rosenblum, 2017). The novel-TMT formation in the GC is mediated by acetylcholine  
82 (ACh) secretion from NBM afferents (Gutierrez et al., 2003; Bermúdez-Rattoni, 2004).  
83 Correspondingly, ACh concentration in the GC is correlated with the novelty of the taste  
84 (Shimura et al., 1995; Miranda et al., 2000; Rodríguez-García et al., 2016). Other brain  
85 regions, however, likely activate the NBM to induce ACh secretion in the GC. A probable  
86 candidate is the BLA, which was implicated in novel taste processing. For example, BLA  
87 lesions or c-Fos blocking during CTA training reduces the CTA to a novel taste to the level  
88 of CTA to a familiar taste (Nachman and Ashe, 1974; Lamprecht and Dudai, 1996; Reilly  
89 and Bornovalova, 2005; St Andre and Reilly, 2007). In addition, BLA inhibition reduces  
90 taste neophobia – the diminished intake of a novel food relative to familiar food –  
91 implicating the BLA in taste novelty processing (Lin et al., 2018). Overall, these data  
92 suggest interactions between the BLA, NBM and GC underlie the processing of taste  
93 novelty.

94           Electrophysiological studies indicate that these interactions may be communicated  
95 through short time windows of neuronal activity. In the GC, taste stimuli elicit a sequence  
96 of short epochs of neuronal spiking activity containing chemosensory (early epoch [EE],  
97 0.15-0.8 sec), palatability (late epoch [LE], 0.8-2 sec) (Katz et al., 2001; Fontanini et al.,  
98 2009; Maier and Katz, 2013) and novelty information (>2 sec) (Bahar et al., 2004).  
99 Interestingly, palatability is processed in the BLA during the EE (BLA-EE) (Fontanini et  
100 al., 2009) and inhibiting BLA during this epoch decreases palatability representation in the  
101 GC (Piette et al., 2012). This observation led to the hypothesis that palatability information  
102 "flows" from the BLA to the GC (Fontanini et al., 2009; Piette et al., 2012; Haley et al.,  
103 2016). Following the same logic, we hypothesize that BLA-LE activity is involved in  
104 novelty processing and that this information is transmitted to the GC, either directly  
105 (McDonald and Jackson, 1987; Haley et al., 2016), or indirectly through the NBM  
106 (McDonald and Jackson, 1987). The later seems appealing given the role of the  
107 BLA→NBM pathway in coding of arousing events (McGaugh, 2004).

108           To test these hypotheses we combined optogenetics, immunohistochemistry and  
109 electrophysiological recordings in behaving rats. Our results show that BLA-LE activity  
110 during novel-taste consumption is essential for the formation of CTA learning.  
111 Interestingly, this activity affects learning-related palatability coding changes in GC,  
112 without any influence on the perception of taste identity or palatability during training. In  
113 addition, our experiments confirmed the importance of the BLA→NBM pathway in CTA  
114 learning and showed that activating this pathway results in c-Fos expression in the GC, a  
115 marker of the novel-TMT formation. Together, our results suggest a new pathway by  
116 which specific BLA neuronal dynamics promotes the creation of taste memory in the GC.

## 117 **Materials and Methods**

### 118 **Animals**

119           Female Wistar rats (Harlan Biotech Israel Ltd) aged ~2.5 months and weighing 225-  
120 250g were used in this study. The rats were kept at the university animal facility under a

121 12h/12h light/dark routine, and while not under a specific experimental protocol received water  
122 and chow *ad libitum*. After having 2 days to acclimatize to their new home the rats were  
123 separated into individual cages. Rats were handled for 15 minutes a day for 3 days in order to  
124 habituate them for human touch. All methods comply with the Tel Aviv University  
125 Institutional Animal Care and Use Committee guidelines

## 126 **Surgeries**

127 *Anesthesia:* Rats were temporarily anesthetized with isoflurane in an induction box,  
128 followed by an intraperitoneal injection of a ketamine-xylazine (KX) (100 and 10 mg/kg,  
129 respectively; maintenance: one-third induction dose every 1h).

130 *Adeno-Associated Virus (AAV) injection:* The anesthetized rat was placed in a  
131 stereotaxic frame, with its scalp excised, the scalp was opened and holes were bored above the  
132 BLA (AP = -2.9mm, ML = +4.85mm, measured from Bregma). Using an injector system (QSI,  
133 Stoelting) a syringe (Hamilton, 10 $\mu$ l, with 30G needle) was lowered slowly to depth of -7.6  
134 from Bregma, and following additional 5 minutes to relieve tissue tension, was lowered to -  
135 8.6mm. Following another 1 minute 0.8 $\mu$ l of viral vector (either experiment AAV<sub>8</sub>-CamKII $\alpha$ -  
136 ArchT-GFP, or control AAV<sub>8</sub>-CamKII $\alpha$ -GFP, University of North Carolina Vector Core) was  
137 injected in a flow rate of 0.1 $\mu$ l/minute (Gradinaru et al., 2008). At the end of the injection  
138 process the needle was left at the injection site for additional 5 minutes to allow virus spread.  
139 The needle was then pulled up another 1 millimeter, and following additional 2 minutes slowly  
140 withdrawn. The process was repeated on the other hemisphere. After the second injection, the  
141 rat was sutured and given post-operative care. Twenty one days were given for recovery and  
142 virus expression prior to fiber-optic and electrode implantation.

143 *Fiber-optic and electrode implantation:* The anesthetized rat was placed in a  
144 stereotactic frame and the scalp was reopened. The skull was thoroughly cleaned using sterile  
145 que tips, Kimwipes and bleached with peroxide (30%). Four self-tapping ground screws were  
146 inserted into the skull. The previously-drilled holes above the BLA were cleaned to allow the

147 insertion of two optic fibers (200 $\mu$ , 0.39NA, FT200UMT, Thorlabs) with metal ferules  
148 (Thorlabs, 2.5mm) that were implanted above the BLA (AP = -2.9mm, ML =  $\pm$ 4.85mm, DV  
149 = -8 mm, from Bregma) or NBM (AP=-1.4mm, ML= $\pm$ 2.8mm, DV=-7, from Bregma). For  
150 electrophysiological experiments an additional hole was drilled above the GC (AP = 1.4mm,  
151 ML = 5mm, DV = -4.5mm, relative to Bregma), and the dura was removed. Either one or two  
152 self-made movable 32 electrode bundles (Piette et al., 2012; Moran and Katz, 2014) were then  
153 lowered into the GC, and secured to the skull with dental acrylic. In addition, two intraoral  
154 cannulas (IOC, flexible plastic tubing, AM-Systems) were inserted through the oral cavity  
155 lateral to the second molar tooth (Phillips and Norgren, 1970; Piette et al., 2012; Moran and  
156 Katz, 2014). When finished the entire structure was covered with dental acrylic. Rats were put  
157 in individual cages and given at least 7 days to recover from the second surgery.

158 *Optrode implantation and recording:* We used optrode to confirm our ability to inhibit  
159 the BLA projection neurons in prolonged and short stimulation. The optrode was made by  
160 gluing 8 electrodes to same optic fiber used in our optogenetic experiments and cutting them  
161 ~0.5 mm below the end of the fiber. The optrodes were implanted similarly to the optic fiber  
162 implantation. Following 7 days of recovery, the rats were connected to the recording and  
163 optogenetic systems and neuronal activity from the BLA neurons was recorded with and  
164 without the laser pulses of 3 and 0.5 seconds. Laser power was set to achieve 30-40mW  
165 illumination at fiber tip.

166 *Post-operative treatment:* Following surgery, the rats were given subcutaneous  
167 injections of antibiotics (5mg/kg of Baytril 5%), pain relievers (1mg/kg of Meloxicam 0.5%)  
168 and Saline (10ml/kg) to ensure hydration. The head wound margins were treated with antibiotic  
169 cream.

## 170 **Experimental Design**

171 *CTA paradigm:* Following recovery, water was removed from the home-cage. The  
172 basic experimental procedure is depicted in Figure 2A, B. Over the initial 3 experiment day



173 days the rats were habituated to poke in an infrared-operated nose-poke (Coulbourn  
174 Instruments) for 40 $\mu$ l drops of water delivered through the IOC in the morning session (with  
175 3 seconds inter-stimulus interval [ISI]), and to 30 minutes access to a water bottle several hours  
176 later (to ensure proper hydration). On day 4 the rats were given a 0.2M sucrose solution instead  
177 of water as a stimulant. Importantly, sucrose was chosen as a stimulant as sucrose evokes only  
178 minimal neophobic reaction (Miller and Holzman, 1981), thus exclude possible impact of BLA  
179 optogenetic inhibition over neophobic process. During sucrose IOC deliveries the BLAs of the  
180 rats were inhibited in different epochs according to the specific experimental group (Fig. 2B,  
181 green bars). Taste delivery times initiated by crossing the infrared beam in the nose poke were  
182 recorded by the electrophysiological acquisition system (Inten Technologies). Following 20  
183 minutes the session ended, the rats were returned to their home cage, and twenty minutes later  
184 were given an intraperitoneal injection of 0.3M Lithium Chloride (LiCl, 1% body weight) to  
185 induce malaise. The next morning (day 5) the rats were placed again in the experimental  
186 chamber and were offered to poke for sucrose as in day 4. The reduction in their willingness  
187 to poke was used to measure the effects of the CTA learning (presented as % of pre-CTA  
188 pokes).

189 *CTA paradigm with electrophysiology:* The experimental procedure involving  
190 electrophysiological recording in the GC is shown in figure 6B. The procedure mimics the  
191 previously described CTA paradigm, but here the free-poking session was followed by a ~40  
192 minute passive delivery session in which drops of tastes were delivered through the IOC to  
193 record neuronal taste responses (with a 20 seconds ISI). During the first 3 habituation days  
194 water, citric acid (CA, 0.1M) and salty (NaCl, 0.1M) solutions were offered through the IOC,  
195 and sucrose (Suc, 0.2M) was added to these 3 tastes in the 4<sup>th</sup> (Pre-CTA) and 5<sup>th</sup> (Post-CTA)  
196 days.

197 *BLA optogenetic inhibition (BLA<sub>ox</sub>) paradigm:* A 532nm green laser (CNI, 150mW)  
198 was connected to each of the two fiber optics ferrules and controlled using a TTL signal from  
199 an Arduino board. Laser strength was set according to the specific implanted fiber

200 characteristics to achieve 30-40mW at the tip. Laser onset and duration were set according to  
201 the specific experimental group and coupled to taste delivery. The different epochs used were  
202 (in milliseconds from taste delivery): 0-3000 (Full), 0-500 (EE), 700-1200 (LE), 2500-3000.  
203 In one group we extended the ISI to 5000 and used 3500-4000 BLA<sub>ox</sub>.

204 *State-dependency and double CTA procedure:* Rats were subjected to the same  
205 experimental paradigm as described above in “CTA paradigm”. However, the rats that tested  
206 state-dependency received BLA<sub>ox</sub> during the testing session in addition to the one in the  
207 training session (Fig. 2B, “Pre+Post1”). Following the test session these rats received a second  
208 LiCl injection and were tested a second time the day after to test their ability to acquire CTA  
209 with multiple CTAs (Fig. 2B, “Pre+Post1+post2”).

210 *Go/No-Go paradigm:* Rats were trained to poke for water as described previously in  
211 “CTA paradigm”. Following habituation to the poking paradigm they were introduced to a new  
212 paradigm in which pseudo-random number of water trials (3-7) were followed by a drop of  
213 0.2M sucrose solution. Rats were required to identify the sucrose and withdraw from the nose  
214 poke for at least 5 seconds. While a successful withdrawal restarted the water trials, a failure  
215 to exit or remain outside long enough was punished by an aversive 10mM quinine drop. After  
216 the rats reached a plateau of at least 70% correct trials we started daily sessions in which we  
217 performed full BLA<sub>ox</sub> simultaneously with sucrose deliveries in random half of the trials. To  
218 eliminate light information from guiding the rats' decision an additional non-implanted optic  
219 fiber was turned on during all the trials. BLA<sub>ox</sub> impact on sucrose identification was assessed  
220 by comparing performance between BLA<sub>ox</sub> and non-BLA<sub>ox</sub> within the same animal.

## 221 **Palatability assessment based on poking microstructure**

222 Previous studies have shown that palatability can be inferred from the length of lick  
223 bouts (Davis and Perez, 1993; Hsiao and Fan, 1993). Our use of poking instead of licking  
224 required modification of this method (graphically presented in figure 3D, top). Poking times  
225 collected by our system in response to nose pokes were stored offline. We defined a poking

226 bout as 5 consecutive pokes or more without withdrawal from the nose poke for more than 10  
227 seconds. We then used these data in order to calculate average bout length (measured as pokes  
228 count) and the number of bouts. Since the 3500-4000ms BLA<sub>ox</sub> group used a longer minimum  
229 ISI (5 seconds) it could not be compared with the other groups and therefore was not analyzed.

## 230 **Perfusion**

231 The rats were first anesthetized with KX solution and then perfused with saline (0.9%  
232 NaCl) followed by 4% formaldehyde solution. After fixation the brain was extracted from the  
233 skull and left for 72 hours in a 30% sucrose formaldehyde solution at 4°C until sliced and  
234 mounted on slides.

## 235 **Histology**

236 The fixed brains were cut to 50µm slices using a microtome (Fisher Scientific), plated  
237 on microscope slides, covered with DAPI containing preservative (Invitrogen Flouromount-G  
238 with DAPI) and left to dry for 24 hours. Spread and expression of the virus and the correct  
239 location of the optic fibers above the BLA were performed using fluorescent microscope. Only  
240 rats with bilateral correct fiber location and sufficient virus expression were included in the  
241 study.

## 242 **Novel taste paradigm for c-Fos expression**

243 Rats that were used in the c-Fos experiments followed the same AAV infection, fibers  
244 and IOC surgeries as previously described for the behavioral experiments. The control groups  
245 were infected with sham virus and implanted with fibers and IOC similar to the experimental  
246 group. Following at least 7 days of recovery the rats were habituated to a watering schedule  
247 for 3 days as previously described. On the 4<sup>th</sup> day the different groups received sucrose solution  
248 (or water, in the water groups) with or without BLA<sub>ox</sub> during either full (0-3000) or LE (700-  
249 1200) ms post taste delivery. Importantly, the control groups received laser stimulation but  
250 without a functional virus. At the termination of the experimental session the rats were returned  
251 to their home cage. Exactly 90 min afterwards the rats were anesthetized with KX

252 (100mg/10kg, injected IP), perfused transcardially with 0.1M phosphate-buffered saline (PBS,  
253 pH 7.4) followed by 4% paraformaldehyde (PFA) in PBS. Afterwards, brains were removed  
254 and post-fixed in 4% PFA for 24 hr, followed by 30% sucrose solution in PBS for 72hr at 4°C.  
255 Coronal sections of 50 µm were cut using a microtome (Fisher Scientific) and were collected  
256 into a cryoprotectant solution (25% Glycerol and 25% Ethylene Glycol in 0.1 M PO<sub>4</sub>) and  
257 stored in 4°C until immunofluorescence assay.

### 258 **Immunofluorescence assay**

259 Free-floating sections were rinsed (3 X 10 min) with PBS, then permeabilized for 4h  
260 in PBS containing 0.3% Triton X-100 (PBS-Tx), followed by 3h blocking with 2.5% Normal  
261 Goat Serum in PBS-Tx at room temperature. Sections were then incubated with the rabbit anti-  
262 Fos primary antibody, 1:1000 (Cell Signaling, 2250S) in block at 4°C overnight. Following,  
263 sections were rinsed (3 X 10 min) with PBS, incubated with the secondary antibody Alexa  
264 Fluor® 594 Conjugate goat anti rabbit, 1:1000 (Cell Signaling, 8889S) and with DAPI 1:1000  
265 in block for 3h at room temperature. Sections were rinsed 3 × 10 min with PBS, mounted on  
266 slides, and cover slipped with mounting medium.

### 267 **Image Acquisition and Quantification**

268 Images were acquired using an Olympus epifluorescence microscope (10 × 0.45 NA or  
269 20 × 0.75 NA objective). Quantification of c-Fos positive nuclei was based on 2 images of the  
270 GC region (Bregma 1.5 – 0.0, Paxinos & Watson, 1998) per hemisphere per rat. The threshold  
271 was calculated for each image separately (Yasoshima et al., 2006). Each image was processed  
272 to reach a binary image using the ImageJ software (NIH), followed by automated  
273 quantification of c-Fos positive nuclei that overlaid with DAPI staining to ensure localization  
274 in the nucleus. Counts were averaged per rat and over group.

### 275 **Acquisition and analysis of electrophysiological data**

276 Acquisition and pre-processing: Extracellular neuronal signals were collected from  
277 self-manufactured (Piette et al., 2012; Moran and Katz, 2014) 32-wire electrodes (0.0015"

278 formvar-coated Nichrome wire; AM Systems) positioned within the GC, during taste  
279 deliveries. The data was first collected by an Analog-to-Digital head-stage amplifier  
280 (RHD2132, Intan Technologies) and then sampled at 30Khz by an Intan RHD2000 acquisition  
281 system and stored offline. Common noise was removed from each recorded channel using a  
282 common average reference (CAR) algorithm. Spike sorting was performed using the open-  
283 source KlustaKwik/Phy software (Rossant et al., 2016). Initially, putative spikes were detected  
284 using a 3-6 standard deviation threshold, and then automatically clustered. Using the Phy  
285 software the clusters were further manually classified as noise, multiunit or single unit spiking  
286 activity based on the spike shape, apparent refractory period in the autocorrelation plot and  
287 separation from the noise cluster. Only well isolated single neurons were added to the cohort  
288 used in study (Piette et al., 2012; Moran and Katz, 2014), and less than 10% of the electrodes  
289 recorded more than a single unit.

#### 290 **Single-unit palatability distance ratio calculation:**

291 To assess whether sucrose palatability in a certain neuron is coded as aversive or  
292 palatable we compared its sucrose response firing rate to responses to aversive citric acid or  
293 palatable salty solution. Specifically, we defined the response distance (RD) as the difference  
294 between the firing rate of a neuron in the 700-1200ms window to sucrose and either aversive  
295 0.1M citric acid ( $D[S\sim C]$ ) or palatable NaCl 0.1M ( $D[S\sim N]$ ). RD was calculated as the  
296 Euclidean distance between two N-dimensional vectors containing the neuron's firing rate  
297 during N 50ms time bins (see graphical representation of RD calculation in Fig. 7A). We then  
298 calculated for each neuron the palatability distances ratio as  $PD = \frac{D[S\sim C]}{D[S\sim N]}$ . The higher the PD  
299 (above 1), the more sucrose is coded as palatable.

#### 300 **Neuronal population palatability evaluation:**

301 NaCl, CA and sucrose trials from the forced taste delivery part of the CTA paradigm  
302 (second part of each daily session, Fig. 6B) were used for the classification of sucrose trials.  
303 Taste neuronal responses were averaged over the bins corresponding to the epochs tested (0-

304 250ms, 250-500ms, 500-750ms, 750-1000ms, 1000-1250ms, 1250-1500ms) for each neuron  
305 in order to receive an N-dimensional population response vector for each trial in each epoch  
306 (N = collective number of neurons from an experimental group). We then used random 70%  
307 of the NaCl and CA trials to train a Multi-Layered Perceptron taken from the Scikit-learn  
308 package with 2 hidden layers of 100 and 50 cells. Following training, the performance of the  
309 network was tested with the remaining 30% trials of NaCl and CA responses and the amount  
310 of correctly predicted trials was calculated. Sucrose trials were fed into the same network and  
311 the probability of sucrose being identified as NaCl was received. This entire process was  
312 repeated 200 times for each epoch in each group and averaged out in order to eliminate noise  
313 based on starting conditions or the selection of a specific train/test split.

#### 314 **Statistical analysis:**

315 Statistical analyses were conducted using Python, specifically the statsmodels and  
316 scipy packages, and SPSS (IBM). ANOVAs followed by post-hoc t-tests were conducted to  
317 evaluate the statistical significance of the differences between groups or experimental  
318 procedures when the data was normally distributed. When the data was not normally  
319 distributed Kruskal-Wallis was used followed by post-hoc Mann–Whitney U tests. Two-tailed  
320 tests were used unless otherwise stated. The significance level was set at  $\alpha = 0.05$ . Data  
321 statistics, including all error bars, are presented as mean  $\pm$  standard error of the mean unless  
322 otherwise stated.

#### 323 **Results**

324 To study the importance of short-term BLA projection neuron activity in taste  
325 perception and learning we employed an optogenetic approach. Specifically, bilateral BLA  
326 infection with AAV<sub>8</sub>-CamKII $\alpha$ -ArchT-GFP (AAV<sub>8</sub>-CamKII $\alpha$ -GFP in control groups)  
327 targeting the excitatory projection neurons (Fig. 1A) was followed by bilateral fiber optic  
328 implantation with the tips located within and above the BLA (Fig. 1B). Post-experiment  
329 analysis of brain slices confirmed wide-spread infection within the BLAs (Fig. 1C), as well as

330 the correct localization of the fiber tips (Fig. 1D). Only rats that exhibited both virus expression  
331 and localization, and correct fiber positioning were included in this study. We confirmed our  
332 ability to optogenetically inhibit the BLA for short (0.5 sec) and long (3 sec) timespans with  
333 limited rebound excitability (Madisen et al., 2012; Mattis et al., 2012). This was done using  
334 an optrode device (Fig. 1E, see the Methods section) capable of simultaneous recording and  
335 optogenetic manipulation within the same brain region. Example recordings from the BLA  
336 with long (3 seconds) and short (0.5 sec) BLA<sub>ox</sub> are presented in Fig. 1F and Fig. 1G,  
337 respectively. These recordings confirmed that under our BLA<sub>ox</sub> protocol, neurons exhibit fast  
338 inhibition, and quickly return to normal firing when the light was turned off, with a minimal  
339 rebound excitation. With this confirmation in hand, we proceeded to test the roles of the BLA  
340 in taste perception, memory and learning.

341

### 342 **Prolonged optogenetic BLA inactivation during novel taste experience attenuates CTA** 343 **learning**

344 Our first aim was to confirm our ability to attenuate CTA acquisition for a novel taste  
345 using prolonged BLA optogenetic inhibition, as was previously reported following BLA lesion  
346 (Nachman and Ashe, 1974; Rollins et al., 2001; Reilly and Bornovalova, 2005; St Andre and  
347 Reilly, 2007) and pharmacological interventions (Lamprecht and Dudai, 1996; Berman et al.,  
348 1998, 2000; Koh and Bernstein, 2003). To that end, we trained mildly water-deprived rats to  
349 poke for drops of water delivered through the IOC (Fig. 2A, B, see the Materials and Methods  
350 section). This technique combines clear assessment of behavior with precise control over  
351 stimulus timing. On the training day, sucrose replaced water as a stimulant and the session was  
352 repeated, but now every drop of sucrose was accompanied by BLA<sub>ox</sub> for the 3 seconds ISI,  
353 effectively blocking the BLA for the entire tasting period. To control for possible heat related  
354 effects of the optogenetic stimulation, the control group received similar laser stimulation as  
355 the experimental group but lacked a functional ArchT channel in the BLA. Following this  
356 session, the rats were injected with the emetic LiCl to induce malaise, and consequently CTA.



357 The strength of the CTA was tested the day after when the rats were offered to poke again for  
358 sucrose (Pre-only group).

359 The results of this experiment clearly demonstrate the attenuation of CTA memory  
360 acquisition following BLA inhibition: the BLA<sub>ox</sub> Pre-only group showed significantly reduced  
361 CTA learning compared with the control group (Fig. 2C; t-test,  $p=6.5 \times 10^{-5}$ ). We further  
362 confirmed that the attenuation of learning is not the result of the laser becoming part of the  
363 conditioned stimulus (a generalization decrement effect (Capaldi, 1994; Bouton, 2004)) and  
364 therefore causing a weaker response in the testing day when the laser is absent. To that end,  
365 we added a group in which rats received BLA<sub>ox</sub> during both the training and testing days  
366 (Pre+Post1 group, Fig. 2B). This group showed attenuation of the CTA learning compared  
367 with the control group (t-test,  $p=3 \times 10^{-5}$ ) which was similar to the BLA<sub>ox</sub> Pre-only group (Fig.  
368 2C, t-test,  $p=0.222$ ), and therefore rejects a generalization decrement (state dependency) effect.  
369 An additional injection of LiCl given to the Pre+Post1 group at the end of the first testing  
370 session (Fig. 2B, Pre+Post1+Post2) induced normal CTA (Fig. 2C, t-test vs. control  $p=0.624$ ),  
371 indicating that BLA<sub>ox</sub> attenuates, but does not block the CTA, as was previously reported in  
372 BLA lesion studies (Reilly and Bornovalova, 2005; St Andre and Reilly, 2007). Taken  
373 together, these results confirm that perturbing the initial tasting experience interferes with the  
374 creation of a long-term CTA memory.

### 375 **CTA learning requires the activation of BLA projection neurons during specific epochs**

376 Previous studies reported that neuronal activity in short epochs during GC and BLA  
377 taste responses are correlated with taste qualities such as identity, palatability and novelty  
378 (Katz et al., 2001; Bahar et al., 2004; Jones et al., 2007; Fontanini et al., 2009; Maier and Katz,  
379 2013; Moran and Katz, 2014). We thus went on to test whether BLA activity during a specific  
380 epoch carries information that is important for CTA formation. To that end, we repeated the  
381 CTA procedure with BLA<sub>ox</sub> during training as previously described, but now different groups  
382 of rats were subjected to BLA<sub>ox</sub> only during a specific short (500ms) epoch following each  
383 drop of taste delivery (Fig. 2D). Interestingly, we found that the groups differ in their ability



384 to acquire the CTA memory a day later (Fig. 2E, One-way ANOVA,  $F_{(4,32)}=11.75$ ,  $p<0.001$ ).  
385 While the group receiving BLA<sub>ox</sub> during the early epoch (0-500ms, EE-BLA<sub>ox</sub>) showed normal  
386 sucrose avoidance following the CTA, short BLA<sub>ox</sub> during the late epoch (>700 and <3000ms)  
387 significantly attenuated CTA memory formation (Fig. 2E; t-test vs. control;  $p<10^{-5}$ ,  $p<10^{-4}$  for  
388 700-1200ms and 2500-3000ms groups respectively). This memory attenuation was similar to  
389 that of the BLA<sub>ox</sub> group inhibited for the entire 3000ms (Fig. 2E; t-test vs. Pre-only group,  
390  $p=0.992$ ,  $p=0.358$  for 700-1200ms and 2500-3000ms groups respectively). By extending the  
391 ISI to 5000ms we found that the late boundary of the LE is around 3500ms since BLA<sub>ox</sub> during  
392 3500-4000ms resulted in normal CTA learning (Fig. 2E). These results show that LE activity  
393 in BLA projecting neurons during novel taste experience, but not the EE activity, is required  
394 for intact CTA learning.

### 395 **Activity of BLA projection neurons is not required for taste identity and palatability** 396 **perceptions**

397 What might be the role of the BLA during novel taste experience, and specifically  
398 during the LE, that gives rise to the attenuation of CTA? One possibility is that it interrupts  
399 with the perception of taste identity. Although the BLA is not considered a part of the main  
400 taste system, BLA<sub>ox</sub> might still interrupt the processing of taste identity in other downstream  
401 brain regions. To rule this out, we trained rats in a Go/No Go task. Rats learned to poke for  
402 drops of water delivered through the IOC as before, but withdraw once they identify a drop of  
403 sucrose in order to avoid the delivery of a highly bitter quinine solution 3 seconds later (Fig.  
404 3A, see also the Material and Methods section). The rats improved their performance over days  
405 and reached at least 70% correct performance in 4 days (Fig. 4B). Following reaching a stable  
406 performance, 0-3000ms BLA<sub>ox</sub> was performed during random sucrose presentations in half of  
407 the trials within the same session. We found similar performance between the BLA<sub>ox</sub> and non-  
408 BLA<sub>ox</sub> trials across 4 test days (Fig. 3B, Two-way ANOVA, Day:  $F_{(1,2)}=0.11$ ,  $p=0.89$ ; BLA<sub>ox</sub>  
409  $F_{(1,2)}=0.961$ ,  $p=0.34$ , interaction:  $F_{(1,2)}=2.253$ ,  $p=0.13$ ). As expected, our results suggest that

410 misperceived taste identity due to BLA inhibition cannot account for the attenuation of CTA  
411 by BLA<sub>ox</sub>.

412 Another possibility is that BLA<sub>ox</sub> interrupts with palatability perception. Sucrose is a  
413 highly palatable taste and rats drink it avidly even when it is novel (Miller and Holzman, 1981).  
414 We reasoned that if the sucrose becomes less palatable with BLA<sub>ox</sub>, we should observe a  
415 reduction of sucrose consumption in the experimental group compared with the control in the  
416 Pre-CTA training day. Our results, however, show that all BLA<sub>ox</sub> groups similarly increased  
417 their consumption of sucrose compared with the previous day (Fig. 3C, Two-way ANOVA,  
418 Taste:  $F(1,5)=68.4$ ,  $p=2.0 \times 10^{-12}$ ; Group:  $F(1,5)=1.72$ ,  $p=0.137$ , Interaction:  $F(1,5)=1.37$ ,  
419  $p=0.241$ , post-hoc t-tests were all with  $p<0.001$ ). Another method for palatability assessment  
420 uses analysis of licking bouts (Davis, 1989; Hsiao and Fan, 1993; Spector et al., 1998). Using  
421 this method with poking bouts (Fig. 3D, upper panel) revealed similarity in bout length  
422 between the BLA<sub>ox</sub> and control groups, indicating no interference of the BLA<sub>ox</sub> with the  
423 perceived high palatability of the sucrose (Fig. 3D lower panel, One-way ANOVA,  $F_{(4)}=1.67$ ,  
424  $p=0.153$ ). The group with the 5000ms ISI was excluded from this analysis since its bout  
425 distribution was incomparable to the 3000ms trials. These results further support our previous  
426 assertion regarding the lack of BLA involvement in taste identity perception since licking  
427 behavior should depend on taste identity. Together, these results indicate that CTA impairment  
428 following BLA inhibition cannot be explained by indirect changes in taste identity or  
429 palatability perceptions.

#### 430 **CTA learning is mediated by LE-BLA activity through the BLA→NBM pathway**

431 Since the basic perceptions of identity and palatability were intact under BLA<sub>ox</sub>, we  
432 moved on to test whether BLA-LE activity is essential for the taste novelty processing and the  
433 creation of a novel TMT. Novelty processing and TMT are probably distributed across several  
434 brain regions (Bermúdez-Rattoni, 2004; Bermudez-Rattoni, 2014), but there is an overall  
435 agreement that the GC is one of its primary locations (Bermúdez-Rattoni, 2004; Spector, 2009;  
436 Adaikkan and Rosenblum, 2012). The creation of the TMT in the GC is associated with

437 cholinergic signaling from the NBM (Miranda et al., 2000; Power et al., 2002; Power, 2004;  
438 Bernstein and Koh, 2007; Rosenberg et al., 2016). Since the BLA projects to the NBM and the  
439 BLA→NBM pathway has been shown to enhance other types of memory (Power et al., 2002),  
440 we hypothesized that CTA learning is mediated by LE-BLA activity through the BLA→NBM  
441 pathway, probably to support novelty processing and TMT formation. To test this hypothesis,  
442 we infected the BLA of rats with an ArchT-carrying virus as before (Fig. 4A), but now  
443 implanted the fiber optics above the NBM (Fig. 4B, see Materials and Methods) in order to  
444 selectively inhibit only BLA afferents into the NBM. Inspecting brain sections following BLA  
445 infection revealed dense stained projections from the BLA in the NBM (as well as in other  
446 brain areas such as the stria terminalis) (Fig. 4C). We repeated the CTA protocol with LE-  
447 BLA<sub>ox</sub> during the Pre-CTA training session, but now only the BLA projections to the NBM  
448 were inhibited (LE-BLA→NBM<sub>ox</sub>, n=4) for a brief 500ms between 700-1200ms following  
449 each taste stimulus. Our results show that LE-BLA→NBM<sub>ox</sub> significantly attenuated CTA  
450 learning compared with controls (n=3) infected with a sham virus (Fig. 4D, t-test p<0.001),  
451 and similarly to LE-BLA<sub>ox</sub> performed within the BLA (shown in Fig. 2D, group 700-1200ms,  
452 t-test, p=0.425). This result shows that the influence of LE-BLA activity on CTA acquisition  
453 is transmitted through the BLA→NBM pathway, and further supporting the role of LE-BLA  
454 activity in the novelty processing and the creation of the novel-TMT.

#### 455 **LE-BLA activity during novel taste experience increases c-Fos expression in the GC**

456 The high levels of NBM-secreted ACh in the GC in response to a novel taste initiates  
457 molecular cascades in GC neurons which take part in the formation of the novel-TMT (Berman  
458 et al., 2000; Rosenblum et al., 2000; Gutierrez et al., 2003; Rosenberg et al., 2016).  
459 Transcription of c-Fos, an immediate early gene, is a fundamental part of this process  
460 (Bernstein and Koh, 2007) . If LE-BLA activity promotes (presumably through the NBM) the  
461 acquisition of a novel taste memory, then inhibiting this activity should also prevent the  
462 increased expression of c-Fos in the GC. To test this, we trained rats to poke for water over 4  
463 days and then replaced the water with a novel sucrose solution. Experimental groups received

464 BLA<sub>ox</sub> during taste deliveries. Ninety minutes later (during the peak of a novel taste associated  
465 c-Fos expression (Koh et al., 2003; Wilkins and Bernstein, 2006; Doron and Rosenblum, 2010;  
466 Lin et al., 2012b) brains were harvested and sections from the GC area were cut and immuno-  
467 stained for cell nuclei (DAPI) and c-Fos (see the Methods section). Examples of stained slices  
468 imaged using fluorescent microscopy are presented in Fig. 5A. To test the role of LE-BLA  
469 activity we counted the number of c-Fos expressing neurons in the GC (Fig. 5B). As previously  
470 reported, we found higher number of stained c-Fos cells in rats exposed to a novel sucrose (S)  
471 compared to a familiar sucrose (S-fam) (Fig. 5C, t-test,  $p=0.0006$ ) (Koh et al., 2003; Lin et al.,  
472 2012b). In the experimental groups receiving BLA<sub>ox</sub>, rats exposed to either full (S-BLA<sub>ox</sub>) or  
473 short LE-BLA<sub>ox</sub> (S-LE-BLA<sub>ox</sub>) during novel sucrose experience showed significantly lower c-  
474 Fos expression compared with the novel sucrose (S) group (Fig. 5C; t-test,  $p=4.7 \times 10^{-5}$  and  
475  $p=1.1 \times 10^{-3}$  respectively). Laser-only effects were rejected using two additional control groups  
476 that received water as stimulus, one with BLA<sub>ox</sub> (W-BLA<sub>ox</sub>) and the other without (W), both  
477 showing similar low c-Fos expression (t-test,  $p=0.77$ ). Further, consumption comparison  
478 between the 4 sucrose groups (S, S-fam, S-BLA<sub>ox</sub> and S-LE-BLA<sub>ox</sub>) did not reveal significant  
479 differences, thereby confirming that the reduction in the GC c-Fos count in the S-BLA<sub>ox</sub> and  
480 S-LE-BLA<sub>ox</sub> groups is not the result of the lowered sucrose stimulation (Fig. 5D, One-way  
481 ANOVA  $F_{(1,3)}=0.34$ ,  $p=0.71$ ). These results further support a causal relation between the LE-  
482 BLA activity and the activation of molecular pathways creating the TMT in the GC.

### 483 **LE-BLA activity is critical for valence coding changes in GC following CTA**

484 Changes in behavior following learning are the consequence of changes in neuronal  
485 firing activity. Following CTA, single-neuron taste responses (Yasoshima et al., 1995; Moran  
486 and Katz, 2014) and ensemble dynamics (Moran and Katz, 2014) in the GC change with  
487 transitions in the palatability valence (from palatable to aversive). We therefore tested whether  
488 the observed attenuated behavior following LE-BLA<sub>ox</sub> is the result of disrupted palatability  
489 coding in the GC. To do this, we infected the BLAs of rats as before to allow BLA<sub>ox</sub> (Fig. 6A  
490 top), but in addition to the optic fibers we implanted a bundle of electrodes in the GC (Fig. 6A

491 bottom). Rats underwent the same CTA procedure as before, but each daily session was  
492 divided into two parts: an initial 20 minutes of free poking for drops of liquid delivered through  
493 the IOC with 3 seconds ISI (Fig. 6B, top), followed by forced delivery of taste drops through  
494 the IOC with 20 seconds ISI (Fig. 6B, bottom) to record neuronal taste responses. A control  
495 group (Ctrl) was infected with sham virus and passed the same procedure as the experimental  
496 group. We recorded in total 184 neurons (Ctrl-Pre [n=71], Ctrl-Post [n=43], BLA<sub>ox</sub>-Pre [n=24]  
497 and BLA<sub>ox</sub>-Post [n=46]) from 4 control and 5 BLA<sub>ox</sub> rats. When we tested the effect of random  
498 short BLA<sub>ox</sub> on the baseline activity of GC neurons, we found that it elicited either excitation  
499 (Fig. 6C, left) or inhibition (Fig. 6C, right), similarly to what was found using long term *in-vivo*  
500 BLA pharmacological inhibition (Piette et al., 2012), and in agreement with *in-vitro* studies of  
501 BLA→GC connectivity (Haley et al., 2016). While more neurons were inhibited than excited  
502 (Fig. 6D), the increased firing rate in excited neurons was about 2 times larger than the decrease  
503 in inhibited neurons (59.3% vs. 28.4%, respectively). As expected, the ratio between sampled  
504 excitatory and inhibitory neurons were similar between the groups (Fig. 6E) ( $\chi^2$  test, p=0.63).  
505 In addition, no difference was observed between the groups in the population averaged baseline  
506 and taste-evoked firing across days (Fig. 6F).

507 We proceeded to test the impact of LE-BLA activity on the post-CTA update of GC  
508 palatability coding. First, the spiking activity in response to each taste delivery was used to  
509 calculate the post-stimulus time histogram (PSTH, Fig. 7A) for each neuron and each of the  
510 tastes. We used these PSTH responses to define the "Palatability Distance to sucrose" (PD, see  
511 Materials and Methods). PD is high (above 1) when the response to sucrose is typified by firing  
512 dynamics that are similar to the response to the palatable salt solution, and low (below 1) when  
513 this response is similar to aversive citric acid.

514 We first wanted to test whether LE-BLA<sub>ox</sub> during training (before CTA) affects  
515 palatability coding in GC. In figures 3C and 3D we showed that BLA<sub>ox</sub>, including LE-BLA<sub>ox</sub>,  
516 does not change the palatability of sucrose (high consumption of sucrose with BLA inhibition).  
517 This lack of BLA<sub>ox</sub> impact over palatability was also apparent in GC activity profiles: Similar

518 and high PD values were found when sucrose trials were examined either during the active  
519 poking period (with LE-BLA<sub>ox</sub>) or during the passive deliveries (non-BLA<sub>ox</sub>) (Fig. 7B, paired  
520 t-test,  $p=0.88$ ). These results suggest that LE-BLA activity is not essential for GC  
521 representations of palatability information.

522         Next, we studied the importance of LE-BLA epochal activity on the post-CTA update  
523 of palatability coding in the GC. This was done by comparing Pre- to Post-CTA PD values  
524 calculated from the forced taste deliveries in the second part of the sessions (see Fig. 6B,  
525 bottom). As expected from previous studies (Katz et al., 2001; Piette et al., 2012; Sadacca et  
526 al., 2012), GC-EE palatability information in both control and LE-BLA<sub>ox</sub> groups showed low  
527 palatability content (Fig. 7C). Correspondingly, PD values were similarly unchanged by CTA  
528 learning in both groups (Two-way ANOVA, Day:  $F_{(1,1)}=0.61$ ,  $p=0.43$ ; BLA<sub>ox</sub>:  $F_{(1,1)}=0.64$ ,  
529  $p=0.42$ ; Interaction:  $F_{(1,1)}=3.46$ ,  $p=0.065$ ) (Fig. 7C). In contrast, the palatability-rich GC-LE  
530 indeed showed a 3-fold increase in palatability relative to the EE in both groups (Fig. 7D). This  
531 increase was similar for both groups (t-test,  $p=0.13$ ). The groups, however, differ in their  
532 update of palatability following CTA training: while there was a significant decrease in  
533 palatability in the control group (t-test,  $p=0.04$ ), palatability in the LE-BLA<sub>ox</sub> group remained  
534 high and similar to its Pre-conditioning values (t-test,  $p=0.367$ ). These single-neuron level  
535 results are in striking agreement with the rats' behavior across days: rejection of sucrose by the  
536 control group and normal consumption by the LE-BLA<sub>ox</sub> group (Fig. 2E).

537         Previous work also showed that CTA changes population-level palatability  
538 representation in GC neurons (Grossman et al., 2008; Moran and Katz, 2014). We therefore  
539 wanted to test whether LE-BLA activity also influences the update of this representation. To  
540 test this we aggregated neurons from all rats into 4 groups according to the experimental day  
541 and condition (Ctrl-Pre, Ctrl-Post, LE-BLA<sub>ox</sub>-Pre, LE-BLA<sub>ox</sub>-Post). We then trained multi-  
542 layered classifiers to distinguish between salt (palatable) and acid (aversive) solutions using  
543 the neuronal responses (recorded in the passive delivery part of the sessions, see Materials and  
544 Methods). A separate classifier was built for each of the six 250ms time bins, 0-1500ms post-

545 taste. This allowed us to examine population-coded sucrose palatability across time. The  
546 performance of these classifiers in identifying the salty and acid solution showed near chance-  
547 levels during the early activity (0-250ms) and increased to ~90% correct classification from  
548 500ms onwards (Fig. 7E, inset), indicating that taste identity can be read out from early GC  
549 population responses.

550 We used these classifiers to evaluate the role of LE-BLA<sub>ox</sub> in the update of palatability  
551 information in GC neurons following CTA. To do that, we used the trained classifiers to  
552 classify the population responses to sucrose as either NaCl (palatable) or CA (aversive). Prior  
553 to CTA, both the control and experimental groups start at chance level in the EE and increase  
554 to ~90% during LE. These results indicate that on the population-level, sucrose is classified as  
555 palatable. Following CTA the control group significantly lowered its classification of sucrose  
556 as palatable (Fig. 7E), in accord with the behavioral results showing lower sucrose  
557 consumption (Fig. 2E). In contrast, in the experimental group that received LE-BLA<sub>ox</sub>, most  
558 trials were still classified as palatable. This analysis, therefore, clearly shows that the LE-  
559 BLA<sub>ox</sub> caused a lack of update in sucrose palatability coding that remains "palatable" even  
560 after CTA training. Our electrophysiological results indicate that the LE-BLA activity is a  
561 critical prerequisite for CTA learning that affects the update of GC neurons' palatability  
562 coding, in both the single and ensemble levels.

## 563 **Discussion**

564 Here we examined the roles BLA activity plays during taste perception and memory in  
565 the taste system, and the pathways by which this activity is transmitted. Collectively, our  
566 experiments suggest a distinct role of LE activity of BLA projection neurons (~700-3000 ms  
567 from initial taste experience) in novelty processing and the formation of a novel-taste memory  
568 trace in the GC. We show that BLA<sub>ox</sub>, and specifically the LE-BLA<sub>ox</sub>, interfere with the  
569 acquisition of CTA memory (Fig. 2), without disruption of taste identity or palatability  
570 perception (Fig. 3). In addition, we show that LE-BLA activity during novel taste stimulation  
571 is required for c-Fos expression in the GC (Fig 5) – a known marker of the novel-taste memory



572 formation in the GC. Correspondingly, LE-BLA activity during novel taste experience is  
573 required for the update of palatability coding in GC following CTA (Fig 7). Lastly, we were  
574 able to show that the BLA→NBM pathway is an essential pathway for transmission of LE-  
575 BLA information required for CTA (Fig 4). Together, these results reveal a circuit for novel  
576 taste processing that promotes the creation of taste recognition memory across the BLA, NBM  
577 and GC through temporally specific neuronal dynamics.

578         The BLA has been implicated in novel taste processing for a long time (Nachman and  
579 Ashe, 1974; Miranda et al., 2003b; Reilly and Bornovalova, 2005; St Andre and Reilly, 2007).  
580 However, there is no clear system-level understanding of how novelty information propagates  
581 across regions. The only electrophysiological study that investigated familiarization coding  
582 was done in the GC and showed a correlation between familiarity and neuronal firing rate, but  
583 only in a later phase of the response (>2 sec) (Bahar et al., 2004). Using the same logic as for  
584 palatability coding (which is detected earlier in the BLA than in GC), our results support the  
585 hypothesis that novelty information is first processed in the BLA and then sent to the GC.  
586 Whether the BLA itself is the source for taste novelty or familiarity, or whether it receives this  
587 information from different brain areas remains an open question. Answering this question will  
588 require a systematic search for novelty/familiarity correlates across the taste system.

589         One of the main contributions of this study is to show the distinct roles played by the  
590 BLA in shaping taste-related behaviors. Short-timed LE-BLA<sub>ox</sub> attenuated the novelty-related  
591 learning of CTA, however even a complete BLA inhibition showed no effect on the ability of  
592 the rats to identify a taste (Fig. 3B) or to perceive its palatability (Fig. 3C, D). The lack of  
593 BLA<sub>ox</sub> impact on perceptual-sensitive tasks seems inconsistent with studies showing  
594 correlations between neuronal activity in the BLA and palatability processing (Fontanini et al.,  
595 2009) and reduced GC palatability information following BLA pharmacological inhibition  
596 (Piette et al., 2012). At least two propositions may reconcile these inconsistencies. According  
597 to the first, the BLA is indeed involved in taste palatability perception, but it is not exclusive  
598 in doing so. Correspondingly, other brain areas were shown to be involved in palatability



599 processing, and may compensate for the lack of BLA input such as the parabrachial pontine  
600 nucleus (PbN) (Baez-Santiago et al., 2016), medial prefrontal cortex (Jezzini et al., 2013) and  
601 the nucleus accumbens (Taha and Fields, 2005). The second option is that although there exist  
602 a correlation between neuronal firing rate and palatability, the role of neuronal activity in BLA  
603 and GC is not primarily to support perception but rather to promote memory and learning  
604 processes, such as the formation of a novel-TMT and CTA (Fig. 3C, D). In accord with both  
605 of these interpretations, several studies reported uninterrupted consumption following BLA  
606 lesion or pharmacological inhibition during the training day of the CTA procedure, before any  
607 learning (Rolls and Rolls, 1973; Nachman and Ashe, 1974; Gallo et al., 1992). Therefore, our  
608 study calls for a careful interpretation of correlations between neuronal activities and assumed  
609 perceptions without an additional functional proof of their causal relations.

610         It is important to note that to assess taste perception and memory formation while  
611 disregarding neophobia requires the usage of a taste that minimizes the neophobic reaction.  
612 This was our reason for choosing sucrose, which evokes only minor neophobic responses  
613 (Miller and Holzman, 1981; Franchina and Gilley, 1986; Franchina and Slank, 1988; Flores et  
614 al., 2016), as opposed to saccharin (Domjan and Gillan, 1976; Lin et al., 2012a). This choice,  
615 however, prevented us from exploring the relation between BLA epochal activity and  
616 neophobic reaction. A recent study which used BLA pharmacological inhibition showed that  
617 the BLA is essential for the occurrence of neophobia (Lin et al., 2018). These results are in-  
618 line with our results, emphasizing the role of the BLA in novelty-sensitive behaviors. Whether  
619 the same BLA epoch is responsible for both the neophobic reaction and the formation of the  
620 TMT remains to be discovered.

621         The BLA may influence the GC during novel taste experience directly and/or indirectly  
622 through its connectivity with many other brain regions. In our work, we specifically studied  
623 the role of the BLA→NBM pathway (Fig. 4D). A novel taste is known to evoke a novelty  
624 signal of extracellular ACh secreted from NBM→GC afferents (Miranda et al., 2000, 2003a;  
625 Bermúdez-Rattoni, 2004). The elevated ACh in the GC triggers a complex molecular cascade

626 that includes, among other, ERK-I/II phosphorylation (Rosenblum et al., 2000), c-Fos  
627 activation (Clark and Bernstein, 2009), and decrease in proteasome activity (Rosenberg et al.,  
628 2016), which is known to underlie the creation of the novel-TMT (Bermúdez-Rattoni, 2004).  
629 The BLA is a valid candidate for a NBM activator following the introduction of a novel taste.  
630 Anatomically, the BLA densely innervates the NBM (Grove, 1988; Jolkkonen et al., 2002) and  
631 can potentially influence its activity. Functionally, the BLA→NBM and NBM→cortical  
632 cholinergic projections are known to be important players in the modulation and formation of  
633 memories in other modalities (Dringenberg and Vanderwolf, 1996; Power et al., 2000;  
634 McGaugh, 2002). Accordingly, we showed that the BLA→NBM pathway, and specifically the  
635 LE activity of this pathway, is vital for the creation of CTA. Based on the collective results  
636 obtained here and in previous studies (Jolkkonen et al., 2002; McGaugh, 2002; Miranda et al.,  
637 2003a; Bermúdez-Rattoni et al., 2004) we suggest that the BLA→NBM pathway participates  
638 in novelty processing and the formation of the novel-TMT in the GC, that later results in the  
639 CTA memory formation. We note, however, that we do not claim that the novel-TMT is strictly  
640 confined to the GC. The engram of the novel-TMT is probably distributed across different  
641 brain regions, even in the BLA itself, as suggested by the increase in c-Fos expression in the  
642 BLA following novel taste consumption (Lin et al., 2012b). It was also shown that blocking  
643 ACh input to the GC alone is not sufficient for attenuating CTA, but reducing ACh input to  
644 both GC and BLA is (Gutiérrez et al., 1999). Similarly, noradrenergic receptor blocking in the  
645 BLA following novel taste experience attenuate familiarity learning (Miranda et al., 2003b).  
646 These results suggest that changes in BLA are also important for novelty processing and the  
647 creation of the novel-TMT.

648 In summary, our results demonstrate the importance of the LE-BLA during novel taste  
649 experiencing to the formation of taste memories in the GC. The formation of these memories  
650 crucially depends on the currently understudied BLA→NBM pathway. We suggest that LE-  
651 BLA activity during novel taste experiencing is important for processing taste novelty, the  
652 formation of a TMT in the GC, and following malaise, to the creation of CTA memory. Our

653 results highlight the importance of neuronal dynamics in sensory information processing and

654 in inter-regional communication, memory formation and learning.

655

656 **References**

- 657 Adaikkan C, Rosenblum K (2012) The role of protein phosphorylation in the gustatory cortex  
658 and amygdala during taste learning. *Exp Neurobiol* 21:37–51.
- 659 Baez-Santiago MA, Reid EE, Moran A, Maier JX, Marrero-Garcia Y, Katz DB (2016)  
660 Dynamic taste responses of parabrachial pontine neurons in awake rats. *J Neurophysiol*  
661 115:1314–1323.
- 662 Bahar AS, Dudai Y, Ahissar E (2004) Neural signature of taste familiarity in the gustatory  
663 cortex of the freely behaving rat. *J Neurophysiol* 92:3298–3308.
- 664 Berman DE, Hazvi S, Neduva V, Dudai Y (2000) The role of identified neurotransmitter  
665 systems in the response of insular cortex to unfamiliar taste: activation of ERK1-2 and  
666 formation of a memory trace. *J Neurosci* 20:7017–23.
- 667 Berman DE, Hazvi S, Rosenblum K, Seger R, Dudai Y (1998) Specific and differential  
668 activation of mitogen-activated protein kinase cascades by unfamiliar taste in the insular  
669 cortex of the behaving rat. *J Neurosci* 18:10037–10044.
- 670 Bermudez-Rattoni F (2014) The forgotten insular cortex: its role on recognition memory  
671 formation. *Neurobiol Learn Mem* 109:207–216.
- 672 Bermúdez-Rattoni F (2004) Molecular mechanisms of taste-recognition memory. *Nat Rev*  
673 *Neurosci* 5:209–217.
- 674 Bermúdez-Rattoni F, Ramírez-Lugo L, Gutiérrez R, Miranda MI (2004) Molecular signals  
675 into the insular cortex and amygdala during aversive gustatory memory formation. *Cell*  
676 *Mol Neurobiol* 24:25–36.
- 677 Bernstein IL, Koh MT (2007) Molecular signaling during taste aversion learning. *Chem*  
678 *Senses* 32:99–103.
- 679 Bouton ME (2004) Context and behavioral processes in extinction. *Learn Mem* 11:485–494.
- 680 Capaldi EJ (1994) The sequential view: From rapidly fading stimulus traces to the  
681 organization of memory and the abstract concept of number. *Psychon Bull Rev* 1:156–  
682 181.

- 683 Clark EW, Bernstein IL (2009) Boosting cholinergic activity in gustatory cortex enhances the  
684 salience of a familiar conditioned stimulus in taste aversion learning. *Behav Neurosci*  
685 123:764–771.
- 686 Davis JD (1989) The Microstructure of Ingestive Behavior. *Ann N Y Acad Sci* 575:106–121.
- 687 Davis JD, Perez MC (1993) Food deprivation- and palatability-induced microstructural  
688 changes in ingestive behavior. *Am J Physiol* 264:R97-103.
- 689 Domjan M, Gillan D (1976) Role of novelty in the aversion for increasingly concentrated  
690 saccharin solutions. *Physiol Behav* 16:537–542.
- 691 Doron G, Rosenblum K (2010) c-Fos expression is elevated in GABAergic interneurons of  
692 the gustatory cortex following novel taste learning. *Neurobiol Learn Mem* 94:21–29.
- 693 Dringenberg H, Vanderwolf CH (1996) Cholinergic activation of the electrocorticogram: an  
694 amygdaloid activating system. *Exp Brain Res* 108:285–296.
- 695 Flores VL, Moran A, Bernstein M, Katz DB (2016) Preexposure to salty and sour taste  
696 enhances conditioned taste aversion to novel sucrose. *Learn Mem* 23:221–228.
- 697 Fontanini A, Grossman SE, Figueroa JA, Katz DB (2009) Distinct subtypes of basolateral  
698 amygdala taste neurons reflect palatability and reward. *J Neurosci* 29:2486–2495.
- 699 Franchina JJ, Gilley DW (1986) Effects of pretraining on conditioning-enhanced neophobia:  
700 Evidence for separable mechanisms of neophobia and aversion conditioning. *Anim*  
701 *Learn Behav* 14:155–162.
- 702 Franchina JJ, Slank KL (1988) Salience and the effects of CS preexposure on aversion  
703 conditioning. *Behav Neural Biol* 50:367–373.
- 704 Gallo M, Roldan G, Bureš J (1992) Differential involvement of gustatory insular cortex and  
705 amygdala in the acquisition and retrieval of conditioned taste aversion in rats. *Behav*  
706 *Brain Res* 52:91–97.
- 707 Garcia J, Kimeldorf DJ, Koelling R a (1955) Conditioned aversion to saccharin resulting  
708 from exposure to gamma radiation. *Science* 122:157–158.
- 709 Gradinaru V, Thompson KR, Deisseroth K (2008) eNpHR: a Natronomonas halorhodopsin  
710 enhanced for optogenetic applications. *Brain Cell Biol* 36:129–139.

- 711 Grossman SEA, Fontanini A, Wieskopf JS, Katz DB (2008) Learning-related plasticity of  
712 temporal coding in simultaneously-recorded amygdala-cortical ensembles. *J Neurosci*  
713 28:2864–2873.
- 714 Grove EA (1988) Neural associations of the substantia innominata in the rat: Afferent  
715 connections. *J Comp Neurol* 277:315–346.
- 716 Gutiérrez H, Gutiérrez R, Ramírez-Trejo L, Silva-Gandarias R, Ormsby CE, Miranda MI,  
717 Bermúdez-Rattoni F, Gutierrez H, Gutierrez R, Ramirez-Trejo L, Silva-Gandarias R,  
718 Ormsby CE, Miranda MI, Bermudez-Rattoni F (1999) Redundant basal forebrain  
719 modulation in taste aversion memory formation. *J Neurosci* 19:7661–7669.
- 720 Gutierrez R, Rodriguez-Ortiz CJ, De La Cruz V, Nunez-Jaramillo L, Bermudez-Rattoni F  
721 (2003) Cholinergic dependence of taste memory formation: Evidence of two distinct  
722 processes. *Neurobiol Learn Mem* 80:323–331.
- 723 Haley MS, Fontanini A, Maffei A (2016) Laminar- and Target-Specific Amygdalar Inputs in  
724 Rat Primary Gustatory Cortex. *J Neurosci* 36:2623–2637.
- 725 Hsiao S, Fan RJ (1993) Additivity of Taste-Specific Effects of Sucrose and Quinine:  
726 Microstructural Analysis of Ingestive Behavior in Rats. *Behav Neurosci* 107:317–326.
- 727 Jezzini A, Mazzucato L, La Camera G, Fontanini A (2013) Processing of hedonic and  
728 chemosensory features of taste in medial prefrontal and insular networks. *J Neurosci*  
729 33:18966–18978.
- 730 Jolkkonen E, Miettinen R, Pikkarainen M, Pitkänen A (2002) Projections from the  
731 amygdaloid complex to the magnocellular cholinergic basal forebrain in rat.  
732 *Neuroscience* 111:133–149.
- 733 Jones LM, Fontanini A, Sadacca BF, Miller P, Katz DB (2007) Natural stimuli evoke  
734 dynamic sequences of states in sensory cortical ensembles. *Proc Natl Acad Sci U S A*  
735 104:18772–18777.
- 736 Katz DB, Simon SA, Nicolelis MA (2001) Dynamic and multimodal responses of gustatory  
737 cortical neurons in awake rats. *J Neurosci* 21:4478–4489.
- 738 Koh MT, Bernstein IL (2003) Inhibition of protein kinase A activity during conditioned taste

- 739 aversion retrieval: Interference with extinction or reconsolidation of a memory?  
740 Neuroreport 14:405–407.
- 741 Koh MT, Wilkins EE, Bernstein IL (2003) Novel tastes elevate c-fos expression in the central  
742 amygdala and insular cortex: implication for taste aversion learning. Behav Neurosci  
743 117:1416–1422.
- 744 Lamprecht R, Dudai Y (1996) Transient expression of c-Fos in rat amygdala during training  
745 is required for encoding conditioned taste aversion memory. Learn Mem (Cold Spring  
746 Harb NY) 3:31–41.
- 747 Lin J-Y, Amodeo LR, Arthurs J, Reilly S (2012a) Taste neophobia and palatability: The  
748 pleasure of drinking. Physiol Behav 106:515–519.
- 749 Lin J-Y, Roman C, Arthurs J, Reilly S (2012b) Taste neophobia and c-Fos expression in the  
750 rat brain. Brain Res 1448:82–88.
- 751 Lin JY, Arthurs J, Reilly S (2018) The effects of amygdala and cortical inactivation on taste  
752 neophobia. Neurobiol Learn Mem 155:322–329.
- 753 Madisen L et al. (2012) A toolbox of Cre-dependent optogenetic transgenic mice for light-  
754 induced activation and silencing. Nat Neurosci 15:793–802.
- 755 Maier JX, Katz DB (2013) Neural dynamics in response to binary taste mixtures. J  
756 Neurophysiol 109:2108–2117.
- 757 Mattis J, Tye KM, Ferenczi EA, Ramakrishnan C, O’Shea DJ, Prakash R, Gunaydin LA,  
758 Hyun M, Fenno LE, Gradinaru V, Yizhar O, Deisseroth K (2012) Principles for  
759 applying optogenetic tools derived from direct comparative analysis of microbial opsins.  
760 Nat Methods 9:159–172.
- 761 McDonald AJ, Jackson TR (1987) Amygdaloid connections with posterior insular and  
762 temporal cortical areas in the rat. J Comp Neurol 262:59–77.
- 763 McGaugh JL (2002) Memory consolidation and the amygdala: A systems perspective. Trends  
764 Neurosci 25:456–461.
- 765 McGaugh JL (2004) The amygdala modulates the consolidation of memories of emotionally  
766 arousing experiences. Annu Rev Neurosci 27:1–28.

- 767 Miller RR, Holzman AD (1981) Neophobia: generality and function. *Behav Neural Biol*  
768 33:17–44.
- 769 Miranda MI, Ferreira G, Rami, rez-Lugo L, Bermudez-Rattoni F (2003a) Role of cholinergic  
770 system on the construction of memories: Taste memory encoding. *Neurobiol Learn*  
771 *Mem* 80:211–222.
- 772 Miranda MI, LaLumiere RT, Buen T V., Bermudez-Rattoni F, McGaugh JL (2003b)  
773 Blockade of noradrenergic receptors in the basolateral amygdala impairs taste memory.  
774 *Eur J Neurosci* 18:2605–2610.
- 775 Miranda MI, Ramirez-Lugo L, Bermudez-Rattoni F (2000) Cortical cholinergic activity is  
776 related to the novelty of the stimulus. *Brain Res* 882:230–235.
- 777 Moran A, Katz DB (2014) Sensory Cortical Population Dynamics Uniquely Track Behavior  
778 across Learning and Extinction. *J Neurosci* 34:1248–1257.
- 779 Nachman M, Ashe JH (1974) Effects of basolateral amygdala lesions on neophobia, learned  
780 taste aversions, and sodium appetite in rats. *J Comp Physiol Psychol* 87:622–643.
- 781 Phillips MI, Norgren R (1970) A rapid method for permanent implantation of an intraoral  
782 fistula in rats. *Behav Res Methods, Instrum* 2:124.
- 783 Piette CE, Baez-Santiago M a., Reid EE, Katz DB, Moran A (2012) Inactivation of  
784 basolateral amygdala specifically eliminates palatability-related information in cortical  
785 sensory responses. *J Neurosci* 32:9981–9991.
- 786 Power AE (2004) Muscarinic cholinergic contribution to memory consolidation: with  
787 attention to involvement of the basolateral amygdala. *Curr Med Chem* 11:987–996.
- 788 Power AE, Roozendaal B, McGaugh JL (2000) Glucocorticoid enhancement of memory  
789 consolidation in the rat is blocked by muscarinic receptor antagonism in the basolateral  
790 amygdala. *Eur J Neurosci* 12:3481–3487.
- 791 Power AE, Thal LJ, McGaugh JL (2002) Lesions of the nucleus basalis magnocellularis  
792 induced by 192 IgG-saporin block memory enhancement with posttraining  
793 norepinephrine in the basolateral amygdala. *Proc Natl Acad Sci U S A* 99:2315–2319.
- 794 Reilly S, Bornovalova MA (2005) Conditioned taste aversion and amygdala lesions in the rat:



- 795 A critical review. *Neurosci Biobehav Rev* 29:1067–1088.
- 796 Rodríguez-García G, Miranda MI, Rodríguez-García G, Miranda MI (2016) Opposing Roles  
797 of Cholinergic and GABAergic Activity in the Insular Cortex and Nucleus Basalis  
798 Magnocellularis during Novel Recognition and Familiar Taste Memory Retrieval. *J*  
799 *Neurosci* 36:1879–1889.
- 800 Rollins BL, Stines SG, McGuire HB, King BM (2001) Effects of amygdala lesions on body  
801 weight, conditioned taste aversion, and neophobia. *Physiol Behav* 72:735–742.
- 802 Rolls BJ, Rolls ET (1973) Effects of lesions in the basolateral amygdala on fluid intake in the  
803 rat. *J Comp Physiol Psychol* 83:240–247.
- 804 Rosenberg T, Elkobi A, Rosenblum K (2016) mAChR-Dependent Decrease in Proteasome  
805 Activity in the Gustatory Cortex is Necessary for Novel Taste Learning. *Neurobiol*  
806 *Learn Mem* 135:115–124.
- 807 Rosenblum K, Futter M, Jones M, Hulme EC, Bliss T V (2000) ERK1/II regulation by the  
808 muscarinic acetylcholine receptors in neurons. *J Neurosci* 20:977–985.
- 809 Rossant C, Kadir SN, Goodman DFM, Schulman J, Hunter MLD, Saleem AB, Grosmark A,  
810 Belluscio M, Denfield GH, Ecker AS, Tolias AS, Solomon S, Buzsáki G, Carandini M,  
811 Harris KD (2016) Spike sorting for large, dense electrode arrays. *Nat Neurosci* 19:634–  
812 641.
- 813 Rozin P (1976) The Selection of Foods by Rats, Humans, and Other Animals. *Adv Study*  
814 *Behav* 6:21–76.
- 815 Sadacca BF, Rothwax JT, Katz DB (2012) Sodium concentration coding gives way to  
816 evaluative coding in cortex and amygdala. *J Neurosci* 32:9999–10011.
- 817 Shimura T, Suzuki M, Yamamoto T (1995) Aversive taste stimuli facilitate extracellular  
818 acetylcholine release in the insular gustatory cortex of the rat: a microdialysis study.  
819 *Brain Res* 679:221–226.
- 820 Spector AC (2009) Central Gustatory System and Ingestive Behavior. In: *Encyclopedia of*  
821 *Neuroscience*, pp 685–689. Academic Press.
- 822 Spector AC, Klumpp PA, Kaplan JM (1998) Analytical issues in the evaluation of food

823 deprivation and sucrose concentration effects on the microstructure of licking behavior  
824 in the rat. *Behav Neurosci* 112:678–694.

825 St Andre J, Reilly S (2007) Effects of central and basolateral amygdala lesions on  
826 conditioned taste aversion and latent inhibition. *Behav Neurosci* 121:90–99.

827 Taha S a, Fields HL (2005) Encoding of palatability and appetitive behaviors by distinct  
828 neuronal populations in the nucleus accumbens. *J Neurosci* 25:1193–1202.

829 Wilkins EE, Bernstein IL (2006) Conditioning method determines patterns of c-fos  
830 expression following novel taste-illness pairing. *Behav Brain Res* 169:93–97.

831 Yasoshima Y, Scott TR, Yamamoto T (2006) Memory-dependent c-fos expression in the  
832 nucleus accumbens and extended amygdala following the expression of a conditioned  
833 taste aversive in the rat. *Neuroscience*.

834 Yasoshima Y, Shimura T, Yamamoto T (1995) Changes of taste responses in the insular  
835 cortex in freely behaving rats after acquisition of conditioned taste aversion learning.  
836 *Jpn J Physiol* 45:S188.

837 Yiannakas A, Rosenblum K (2017) The insula and taste learning. *Front Mol Neurosci* 10:1–  
838 24.

839

840

841 **Figure captions**

842 **Figure 1: Verification of viral expression and optogenetic inhibition of the BLA.** A) Rats  
843 were first infected with AAV<sub>8</sub>-CamKII-ArchT-GFP (AAV<sub>8</sub>-CamKII-GFP for controls) viral  
844 vector injected to the BLA, bilaterally. B) In a second surgery 21 days after infection, fiber  
845 optics were implanted above the BLAs, together with bilateral IOCs for taste deliveries C) A  
846 coronal section from a rat infected with AAV<sub>8</sub>-CamKII-ArchT-GFP construct, showing ArchT  
847 expression (tagged by GFP) localized in the BLA complex. Notice that the central amygdala  
848 (CeA), which mostly contains inhibitory GABAergic neurons not targeted by the virus, is  
849 visible but lack the GFP staining. D) Localization of fiber-optic tips in the rats used in this  
850 study. The tip locations from both hemispheres are collapsed on a single hemisphere for better  
851 visibility. E) Schematics of the BLA inhibition verification using an optrode device implanted  
852 in the BLA. F-G) Example of BLA neuronal activity responses to laser illumination recorded  
853 by the optrode in a behaving rat. Both long 3 seconds (F) or short 0.5 second (G) BLA<sub>ox</sub> caused  
854 immediate cessation of neuronal activity followed by a quick return to normal firing after  
855 offset.

856 **Figure 2: Short-term BLA activity is required for CTA acquisition.** A) Schematics of the  
857 experimental design. Rats were implanted with two optic fibers in their BLAs and an IOC that  
858 delivers drops of liquid directly into the oral cavity in response to a nose-poke. Right: This  
859 experimental system provided precisely-timed BLA<sub>ox</sub> with respect to taste deliveries. B)  
860 Prolonged BLA<sub>ox</sub> experimental protocol. During the initial 3 habituation days (Hab) the rats  
861 were trained to poke for drops of water (W) which were continuously delivered with an ISI of  
862 3000ms. On the Pre-CTA day, water was replaced with 0.2M sucrose (Suc) and BLA<sub>ox</sub> was  
863 performed over the entire 3000 ISI. This session was followed by a LiCl injection to induce  
864 malaise (red syringe). On the following day, rats were offered to poke for sucrose drops and  
865 the total number of drops (Consumption) relative to Pre-CTA (% from Pre) was measured to  
866 assess aversion level. Control and Pre-only groups received the same protocol. The Pre+Post1  
867 group received BLA<sub>ox</sub> also during the first Post-CTA day. Pre+Post1+Post2 group received

868 additional LiCl injection after the first Post-CTA day, and tested again a day later. C) Suc  
869 consumption for the groups in B (B). Control group showed strong aversion to sucrose. Pre-  
870 only (n=6) and Pre+Post1 (n=3) groups showed significant attenuation of CTA. Additional  
871 LiCl injection following testing (Pre+Post1+Post2, n=3) caused similar rejection of sucrose as  
872 the control rats, confirming CTA learning. D) Short-term BLA<sub>ox</sub> experimental protocol.  
873 Different groups received 500ms BLA<sub>ox</sub> at specific epoch following each taste delivery in the  
874 Pre-CTA day. E) Consumption for the experiments in (D). BLA<sub>ox</sub> performed during the late  
875 epoch (700-3000ms) shows attenuated aversive memory formation. \*\*\* p<0.001 tested vs. the  
876 control group. Control n=6; 0-500 n=5; 700-1200 n=10; 2500-3000 n=6; 3500-4000 n=7.

877

878 **Figure 3: Effects of long-term BLA<sub>ox</sub> on taste perception and learning.** A) A schematic of  
879 the Go/No-Go experimental paradigm. Rats were trained to poke for random number (3-7) of  
880 water deliveries before receiving a single drop of sucrose. The rats were required to identify  
881 the sucrose taste and withdraw from the nose poke for at least 5000ms in order to avoid a highly  
882 bitter 10mM quinine droplet. Following reaching a plateau performance for 3 consecutive days,  
883 half (randomly chosen) of the sucrose deliveries were performed with full BLA<sub>ox</sub>. B)  
884 Percentage of correctly identified taste trials across days. BLA<sub>ox</sub> showed no significant effect  
885 on the ability of the rats to identify the sucrose taste. C) The number pokes for water (in the  
886 last habituation day) and for 0.2M sucrose (in the training day) prior to CTA. All BLA<sub>ox</sub> groups  
887 poked significantly more for sucrose than water, similar to the control group, showing that their  
888 perception of palatability has not diminished. D) Palatability assessment based on poking  
889 structure. Upper pane: poking bout length analysis. A poking bout was defined as 5 consecutive  
890 taste deliveries (no withdrawal from nose poke) or more. A bout ends when the rat does not  
891 poke for at least 10s. Lower pane: bout length across groups. Distribution of bout length was  
892 similar across BLA<sub>ox</sub> groups and control. \*\*\* p<0.001

893

894 **Fig 4: Inhibiting the BLA→NBM pathway attenuates CTA learning.** A-B) Schematic  
895 illustration of the preparation. A) AAV injection in the BLA followed by B) Fiber optic  
896 implantation above the NBM. C) Fluorescent image of infected BLA axon terminals in the  
897 NBM area showing dense expression. D) Consumption on the Post-CTA day relative to Pre-  
898 CTA day for control and LE-BLA→NBM<sub>ox</sub> rats. Rats receiving LE-BLA→NBM<sub>ox</sub> show  
899 attenuated CTA learning.

900

901 **Figure 5: LE-BLA activity during novel taste experience is required for GC c-Fos**  
902 **expression.** A) 4',6-diamidino-2-phenylindole (DAPI) nuclear counterstain staining (in blue)  
903 with GFP of BLA projection neurons infected with AAV virus (in green) and c-Fos staining  
904 (in red) of the GC in rats from groups receiving different stimulants and BLA<sub>ox</sub> protocols (scale  
905 bar = 200um) B) Example of particle analysis steps used in order to count nuclear co-  
906 localizations of DAPI and c-Fos. A threshold was first calculated for each raw image (left) to  
907 produce a binary image (center) from which round objects in a specific size range were counted  
908 (right) C) Quantification of c-Fos+ positive nuclei in GC neurons. Control rats which drank  
909 sucrose without BLA<sub>ox</sub> (S group) showed a significantly higher expression pattern when  
910 compared to rats drinking either a familiar sucrose (S-fam), or rats drinking a novel sucrose  
911 with full (S-BLA<sub>ox</sub>) or late-epoch (S-LE-BLA<sub>ox</sub>). Two additional control groups that received  
912 water without or with BLA inhibition (W, and W- BLA<sub>ox</sub>, respectively) rejects laser-only  
913 effects. D) Average sucrose consumption during Pre-CTA was similar between groups and  
914 control, thus cannot account for the differences in c-Fos expression patterns are not due to  
915 changes in drinking patterns. \*\*\* p<0.001, \*\* p<0.01.

916

917 **Figure 6: Experimental paradigm for testing palatability coding changes in GC neurons**  
918 **following CTA with LE-BLA<sub>ox</sub>.** A) Top: Rats were first bilaterally infected with viruses  
919 containing either ArchT or GFP (controls) in the BLA. Bottom: Following recovery

920 simultaneous LE-BLA optogenetic inhibition and GC neuronal recording were performed. B)  
921 Experimental procedure: Each daily session was divided into two parts: initial 20 minutes of  
922 active poking for liquids (top) followed by forced tastes deliveries for taste response recording  
923 (W – water, N – NaCl, C/CA – citric acid, S – sucrose). Rats received LE-BLA<sub>ox</sub> (Green bar)  
924 during the poking session of the training day. Injection of LiCl was given at the end of the  
925 forced taste delivery session. C) Example GC neurons being either excited (left) or inhibited  
926 (right) by 0.5 second BLA<sub>ox</sub>. Top: Raster plot of spikes. Bottom: Average firing rate over all  
927 trials, presented as peri-inhibition time histogram. Red lines delimit BLA<sub>ox</sub> time. D) Percentage  
928 of neurons that were excited, inhibited or unaffected by BLA<sub>ox</sub> E) Percentage of putative  
929 excitatory and inhibitory neurons in the recorded GC neuronal population. F) Mean firing rate  
930 of neuron before (BL), 0-500ms after and 700-1200ms after taste delivery from BLA<sub>ox</sub> and  
931 control animals shows no significant difference between groups and group x day interaction.  
932 Two-way ANOVA: BL Group p=0.8, Day p=0.99, Group x Day p=0.28; 0-500 Group p=0.92,  
933 Day p=0.44, Group x Day p=0.95; 700-1200 Group p=0.9, Day p=0.46, Group x Day p=0.68  
934

935 **Figure 7: LE-BLA activity during taste exposure is important for CTA-related GC**  
936 **neurons palatability update.** A) Palatability distance (PD) ratio calculation for a  
937 representative neuron. Colored lines represent mean responses of the neuron to sucrose (Suc),  
938 NaCl and citric acid (CA) solutions. Vertical colored arrows in the 700-1200 ms epoch (shaded  
939 grey area) mark the distances used for the calculation of response differences (RD), brown  
940 arrows for the RD[S~C], and pink for RD[S~N]. The ration between the RDs was used for PD  
941 calculation. B) The effect of LE-BLA<sub>ox</sub> on palatability coding during training. Pre-CTA PD  
942 values during the active poking (with BLA<sub>ox</sub>), and from the passive deliveries (non-BLA<sub>ox</sub>)  
943 during the LE period in the experimental group. C, D) The effect of LE-BLA<sub>ox</sub> on palatability  
944 coding following CTA. C) PD of sucrose during the EE (0-500ms) was low for all groups  
945 before and after CTA. D) LE (700-1200ms) sucrose palatability was high in both groups before  
946 CTA. While CTA caused a significant decrease of palatability in the control group, it remained

947 high and similar to Pre-CTA levels in the LE-BLA<sub>ox</sub> group. E) Population-level palatability  
948 coding changes following CTA but not under LE-BLA<sub>ox</sub>. Time-binned GC neuronal responses  
949 to sucrose were classified as either NaCl (palatable) or CA (aversive) using a classifier trained  
950 with only NaCl and CA trials. Pre-CTA sucrose response of control and LE-BLA<sub>ox</sub> groups  
951 were equally successful in classifying sucrose trials as palatable in the LE bins (starting at  
952 750ms). Post-CTA sucrose trials of the control group were significantly less likely to be  
953 classified as palatable NaCl, while those of the LE-BLA<sub>ox</sub> remained high, similar to Pre-CTA  
954 levels. Two-way ANOVA; Group:  $F(3)=8.2$   $p=2.2 \times 10^{-5}$ , Bin:  $F(6)=20.5$   $p=1.8 \times 10^{-21}$ ,  
955 Interaction:  $F(18)=3.2$   $p=9.9 \times 10^{-6}$ . T-tests between control and LE-BLA<sub>ox</sub> groups in Post-CTA  
956 sessions: Bin0-250  $p=0.09$ , Bin250-500  $p=0.48$ , Bin500-750  $p=0.54$ , Bin750-1000  $p=0.0006$ ,  
957 Bin100-1250  $p=0.01$ , Bin1250-1500  $p=0.002$ . Inset: The classifier's performance in correctly  
958 identifying NaCl and CA trials, reaching ~90% success 500ms after taste stimulation.

959

960

961

962

963

964

965

966

967 **Figure 1**

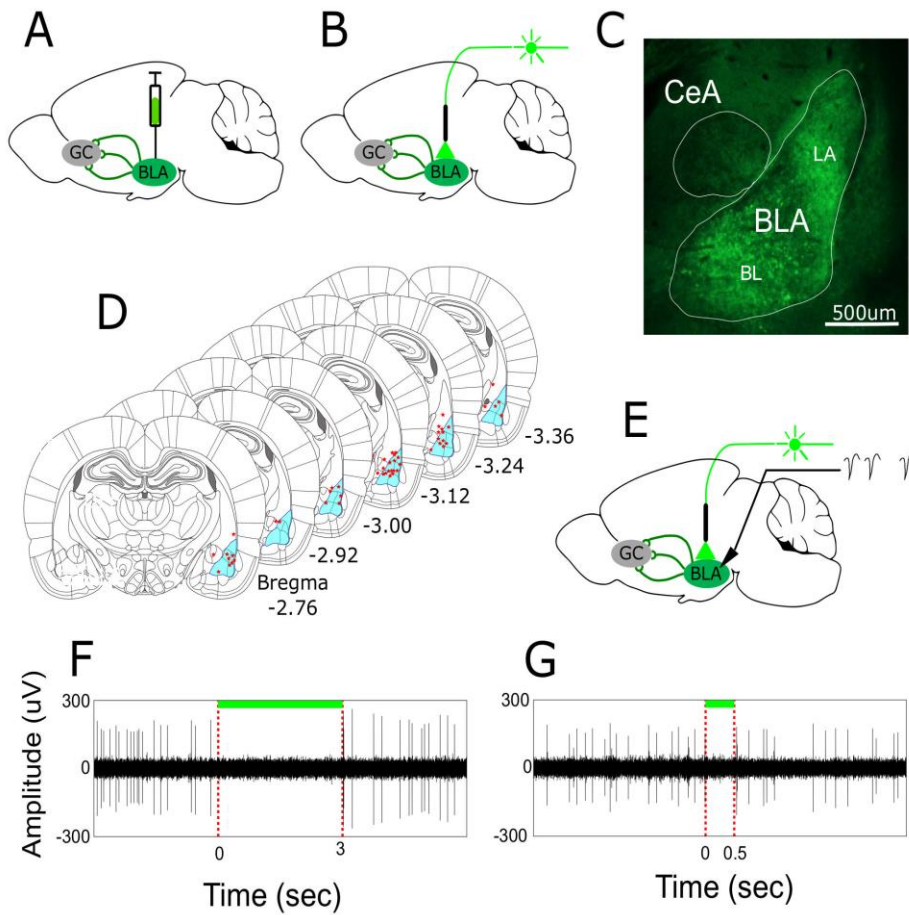

968

969

970

971

972

973

974

975

976

977

978



979 **Figure 2**

980

981

982

983

984

985

986

987

988

989

990

991

992

993

994

995

996

997

998

999

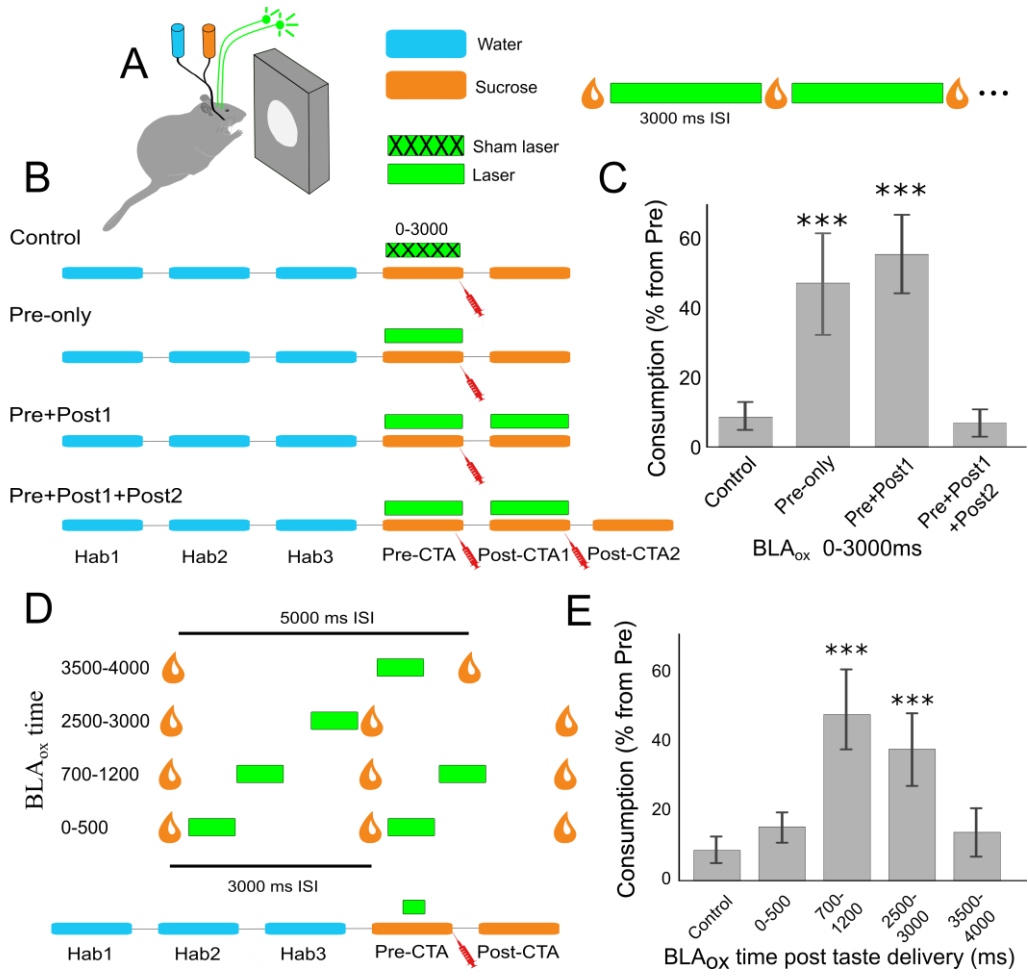

1000 **Figure 3**

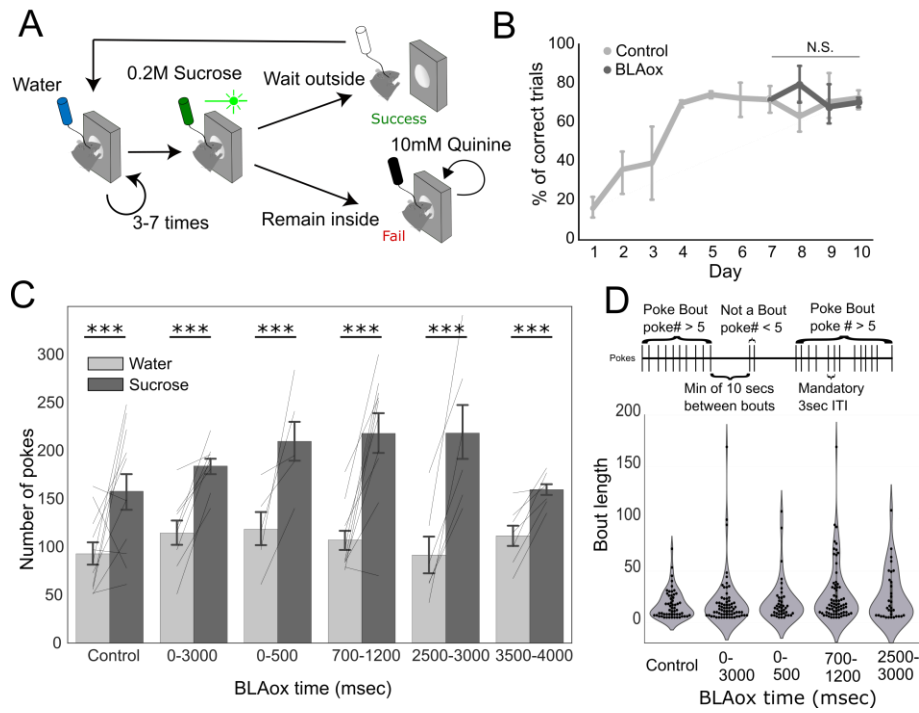

1001

1002

1003

1004

1005

1006

1007 **Figure 4**

1008

1009

1010

1011

1012

1013

1014

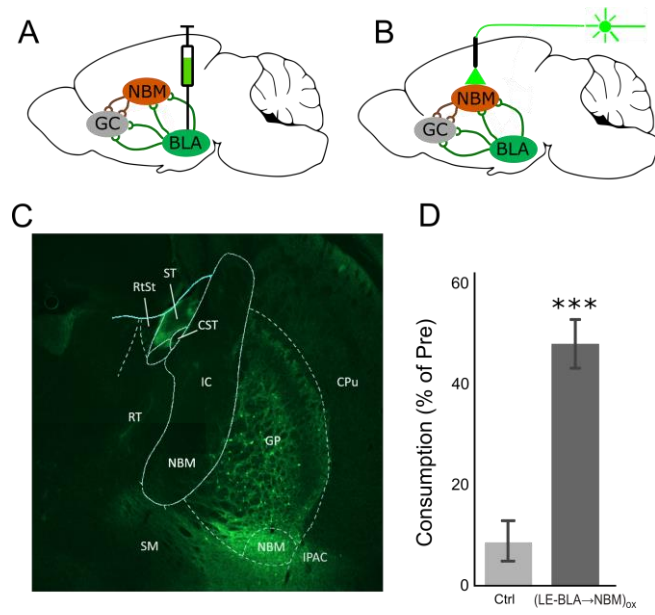

1017 **Figure 5**

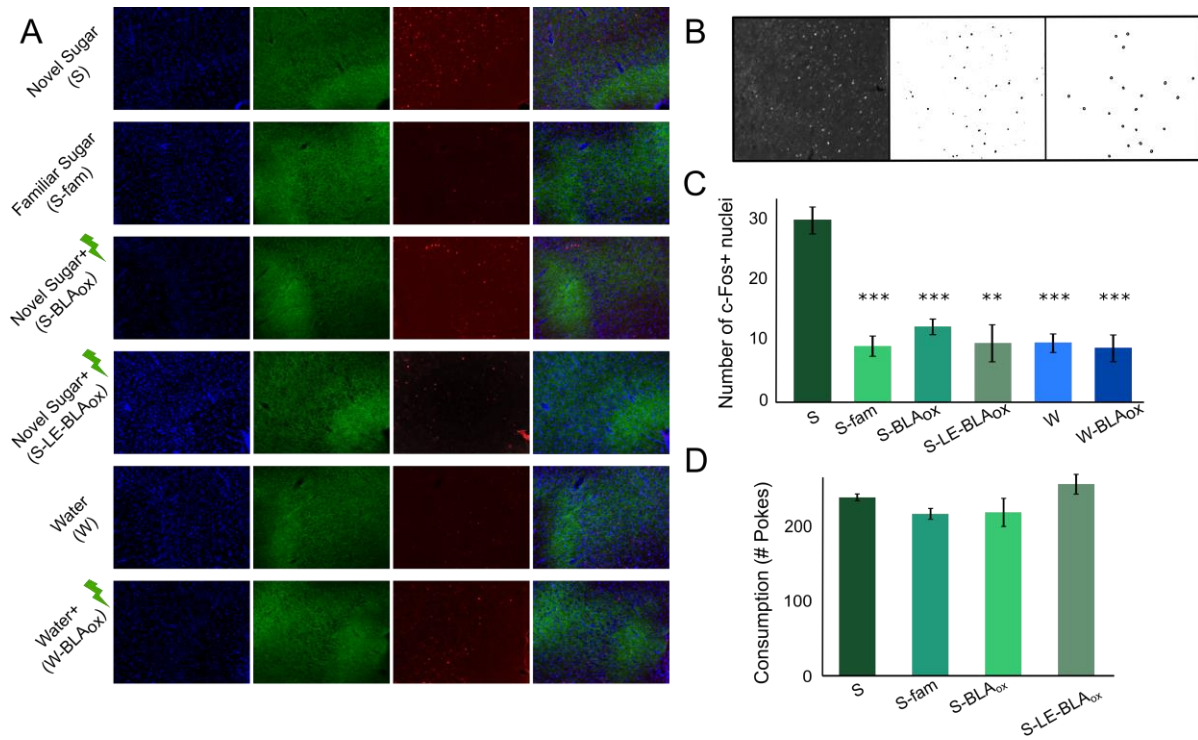

1018

1019 **Figure 6**

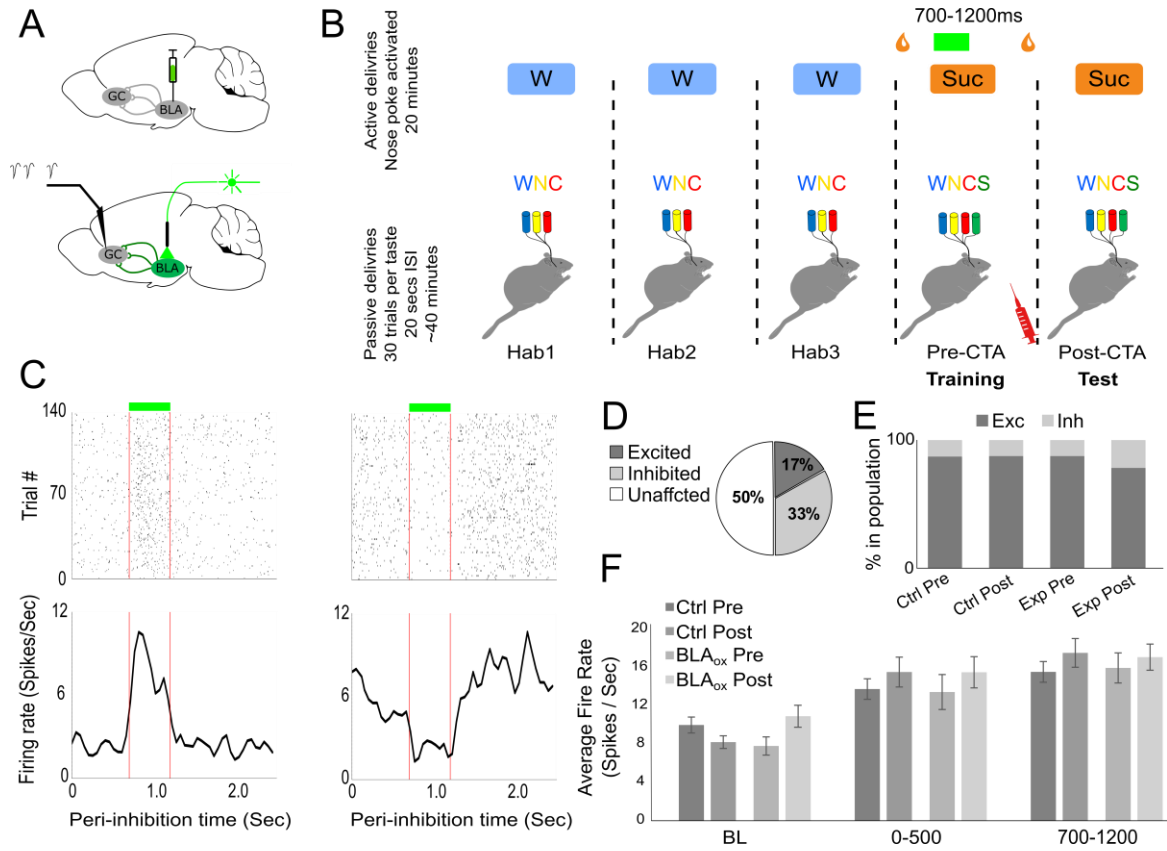

1020

1021

1022

1023 **Figure 7**

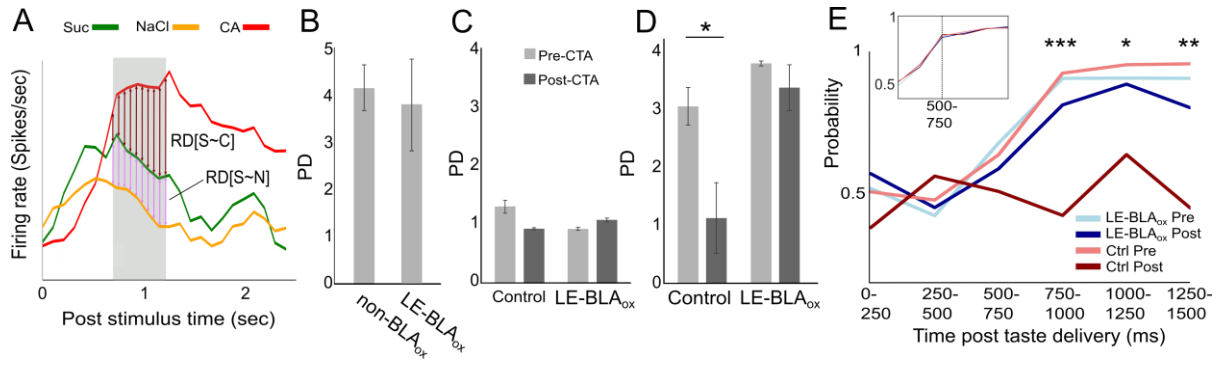

1024
